# Supplementary material
Source: HighWire-hosted journal article supplement (https://err.ersjournals.com/content/28/152/180107)
Supplement: inline-supplementary-material-4 [file inline-supplementary-material-4.xlsx]

## Sheet: Direct effect
				PICO	Protocol	Selection	Search	Screen2	Extract2	Exclude	Include	Bias risk	Funding	Meta	MetaB	RoB	Hetero	P bias	CoI
Author	Year	Title	Top level category	AMSTAR 1	AMSTAR 2	AMSTAR 3	AMSTAR 4	AMSTAR 5	AMSTAR 6	AMSTAR 7	AMSTAR 8	AMSTAR 9	AMSTAR 10	AMSTAR 11	AMSTAR 12	AMSTAR 13	AMSTAR 14	AMSTAR 15	AMSTAR 16	Confidence (high, moderate, low, very low)	Core or supplementary review	Number of randomised studies	Number of non-randomised studies	Total number of included studies
M'Imunya	2012	Patient education and counselling for promoting adherence to treatment for tuberculosis	Adherence	1	1	0	1	1	1	1	1	1	0	-	-	1	1	-	1	High	Core	3	0	3
Auguste	2017	Comparing interferon-gamma release assays with tuberculin skin test for identifying latent tuberculosis infection that progresses to active tuberculosis: systematic review and meta-analysis	Diagnosis	1	0	1	1	1	1	0.5	1	1	0	1	1	1	1	1	1	High	Core	0	17	17
Munoz	2013	Interferon-gamma release assays versus tuberculin skin test for targeting people for tuberculosis preventive treatment: an evidence-based review	Diagnosis	1	0	0	0	1	1	0.5	1	1	0	-	-	0	0	-	0	Very low	Supplementary	0	11	11
Yassi	2013	Workplace programmes for HIV and tuberculosis: a systematic review to support development of international guidelines for the health workforce	Healthcare-associated infection	1	0	0	0.5	1	1	0	1	1	0	-	-	0	0	-	0	Very low	Supplementary	0	3	3
Akolo	2010	Treatment of latent tuberculosis infection in HIV infected persons	HIV/TB	1	1	0	1	1	1	1	1	1	1	1	1	1	1	1	1	High	Core	12	0	12
Gray	2009	Impact of tuberculosis preventive therapy on tuberculosis and mortality in HIV-infected children	HIV/TB	1	1	0	1	1	1	1	1	1	1	-	-	1	-	-	1	High	Core	1	0	1
Suthar	2012	Antiretroviral therapy for prevention of tuberculosis in adults with HIV: a systematic review and meta-analysis	HIV/TB	1	1	0	1	1	1	0.5	1	1	0	1	0	1	1	1	1	High	Core	3	8	11
Bruins	2017	Effect of secondary preventive therapy on recurrence of tuberculosis in HIV-infected individuals: a systematic review	HIV/TB	1	0	0	1	1	0	0	0.5	1	0	-	-	0	0	-	1	Low	Supplementary	3	1	4
Bucher	1999	Isoniazid prophylaxis for tuberculosis in HIV infection: a meta-analysis of randomized controlled trials	HIV/TB	1	0	0	1	1	0	0	1	0.5	0	1	1	1	0	0	0	Low	Supplementary	7	0	7
Ayele	2015	Isoniazid Prophylactic Therapy for the Prevention of Tuberculosis in HIV Infected Adults: A Systematic Review and Meta-Analysis of Randomized Trials	HIV/TB	1	0	0	1	0	0	1	1	1	0	1	0	0	1	0	1	Very low	Supplementary	10	0	10
B-Lajoie	2016	Incidence and prevalence of opportunistic and other infections and the impact of antiretroviral therapy among HIV-infected children in low- and middle-income countries: a systematic review and meta-analysis	HIV/TB	1	0	0	1	1	0	0	1	0	0	1	0	0	0	0	1	Very low	Supplementary	0	12	12
Dodd	2014	The impact of HIV and antiretroviral therapy on TB risk in children: a systematic review and meta-analysis	HIV/TB	1	1	0	1	1	1	0.5	1	1	0	1	0	0	0	0	1	Very low	Supplementary	0	22	22
Low	2016	Incidence of Opportunistic Infections and the Impact of Antiretroviral Therapy Among HIV-Infected Adults in Low- and Middle-Income Countries: A Systematic Review and Meta-analysis	HIV/TB	1	0	0	1	1	0	0	1	0	0	1	0	0	1	0	1	Very low	Supplementary	2	31	33
Fraser	2006	Drugs for preventing tuberculosis in people at risk of multiple-drug-resistant pulmonary tuberculosis	MDR-TB	1	1	0	1	1	-	-	-	-	-	-	-	-	-	-	1	High	Core	0	0	0
Langendam	2013	Adverse events in healthy individuals and MDR-TB contacts treated with anti-tuberculosis drugs potentially effective for preventing development of MDR-TB: a systematic review	MDR-TB	1	0	0	1	1	1	0	1	1	0	-	-	1	1	-	1	High	Core	16	4	20
van der Werf	2012	Lack of evidence to support policy development for management of contacts of multidrug-resistant tuberculosis patients: two systematic reviews	MDR-TB	1	0	0	1	1	1	1	1	1	0	-	-	1	1	-	1	High	Core	0	3	3
Marks	2017	Systematic Review, Meta-Analysis, and Cost Effectiveness of Treatment of Latent Tuberculosis Infection to Reduce Progression to Multidrug-Resistant Tuberculosis	MDR-TB	1	0	0	0	0	0	0	1	0	0	-	-	0	0	-	1	Very low	Supplementary	0	21	21
Nguyen	2014	Tuberculosis care for pregnant women: a systematic review	Pregnancy & gender	1	0	0	1	1	0	0	1	1	0	-	-	0	0	-	1	Very low	Supplementary	0	35	35
Al-Darraji	2012	Isoniazid preventive therapy in correctional facilities: a systematic review	Prisons	1	0	0	0.5	1	1	0	1	0	0	-	-	0	0	-	1	Very low	Supplementary	3	15	18
Kahwati	2016	Primary Care Screening and Treatment for Latent Tuberculosis Infection in Adults: Evidence Report and Systematic Review for the US Preventive Services Task Force	Screening	1	0	0	0.5	1	1	0.5	1	1	0	-	-	0	1	-	1	Low	Supplementary	5	67	72
Curtis	2016	Impact of x-ray screening programmes for active tuberculosis in homeless populations: a systematic review of original studies	Screening	1	0	0	1	0	0	0	1	1	0	-	-	0	0	-	0	Low	Supplementary	0	14	14
Paquette	2014	Chest radiography for active tuberculosis case finding in the homeless: a systematic review and meta-analysis.	Screening	1	0	0	1	0	1	0.5	0.5	1	0	-	-	0	1	-	0	Low	Supplementary	0	16	16
Heuvelings	2017	Effectiveness of interventions for diagnosis and treatment of tuberculosis in hard-to-reach populations in countries of low and medium tuberculosis incidence: a systematic review	Social support and vulnerable groups	1	1	0	1	1	1	0	1	0.5	0	-	-	1	1	-	1	High	Core	1	18	19
Arshad	2014	Community based interventions for the prevention and control of tuberculosis	Social support and vulnerable groups	1	0	0	1	0	0	0	1	1	0	1	0	0	0	0	1	Very low	Supplementary	34	7	41
Ena	2005	Short-course therapy with rifampin plus isoniazid, compared with standard therapy with isoniazid, for latent tuberculosis infection: a meta-analysis	Treatment	1	0	0	1	1	1	0.5	1	0.5	0	1	1	1	1	1	1	High	Core	5	0	5
Sharma	2013	Rifamycins (rifampicin, rifabutin and rifapentine) compared to isoniazid for preventing tuberculosis in HIV-negative people at risk of active TB	Treatment	1	1	0	1	1	1	1	1	1	1	1	1	1	1	1	1	High	Core	10	0	10
Smieja	2000	Isoniazid for preventing tuberculosis in non-HIV infected persons	Treatment	1	1	0	1	1	1	1	1	1	1	1	1	1	1	1	1	High	Core	11	0	11
Zenner	2017	Treatment of latent tuberculosis infection: an updated network meta-analysis	Treatment	1	1	0	1	1	1	0	1	1	1	1	1	1	1	1	1	High	Core	61	0	61
Balcells	2006	Isoniazid preventive therapy and risk for resistant tuberculosis	Treatment	1	0	0	1	0	1	0	1	0.5	0	1	1	1	1	1	1	Moderate	Supplementary	12	1	13
Acuna-Villaorduna	2013	Systematic review of shorter 2-3 months regimens for treatment of latent tuberculosis	Treatment	1	0	0	1	0	0	0	0	0	0	0	0	0	0	0	0	Very low	Supplementary	16	0	16
Cox	2008	Long term efficacy of DOTS regimens for tuberculosis: systematic review	Treatment	1	0	1	1	0	0	0.5	1	0	0	-	-	0	1	-	1	Very low	Supplementary	6	10	16
Haas	2015	A review of rifapentine for treating active and latent tuberculosis	Treatment	1	0	0	0	0	0	0	1	0	0	-	-	0	0	-	1	Very low	Supplementary	12	0	12
Abubakar	2013	Systematic review and meta-analysis of the current evidence on the duration of protection by bacillus Calmette-Guerin vaccination against tuberculosis	Vaccination	1	1	0	1	1	1	1	1	1	1	1	1	1	1	1	1	High	Core	21	111	132
HIQA Ireland	2016	Health technology assessment of a selective BCG vaccination programme	Vaccination	1	1	1	1	1	1	0.5	1	1	0	1	1	1	1	1	1	High	Core	4	10	14
Mangtani	2014	Protection by BCG vaccine against tuberculosis: a systematic review of randomized controlled trials	Vaccination	1	1	1	1	1	1	0.5	1	1	0	1	1	1	1	1	1	High	Core	18	0	18
Roy	2014	The protective effect of BCG vaccination against mycobacterium tuberculosis infection in children: A systematic review	Vaccination	1	0	0	1	1	0	0	1	1	0	1	1	1	1	1	1	High	Core	0	14	14
Ortqvist	2010	Vaccination of children - a systematic review	Vaccination	1	0	0	0	0	0	1	1	1	0	-	-	1	0	-	1	Low	Supplementary	5	26	31
Brewer	2000	Preventing tuberculosis with bacillus Calmette-Guerin vaccine: a meta-analysis of the literature	Vaccination	1	0	0	0.5	0	0	0	0	0.5	0	1	1	1	1	0	0	Very low	Supplementary	7	19	26
Colditz	1995	The efficacy of bacillus Calmette-Guerin vaccination of newborns and infants in the prevention of tuberculosis: meta-analyses of the published literature	Vaccination	1	0	0	0.5	0	0	0	0	0.5	0	1	1	1	1	0	0	Very low	Supplementary	3	9	12
Knuf	1996	Efficacy of BCG vaccination	Vaccination	1	0	0	0.5	0	0	0	0.5	0	0	-	-	0	0	-	0	Very low	Supplementary	0	15	15
Schmitz	2013	Meta-analysis of BCG vaccine efficacy for infants in Ireland	Vaccination	1	0	0	0.5	0	0	0	0	0	0	0	0	0	0	0	0	Very low	Supplementary	5	19	24
Steffen	2015	Vaccine-preventable travel health risks: What is the evidence - What are the gaps?	Vaccination	1	0	0	0	0	0	0	0	0.5	0	-	-	0	0	-	1	Very low	Supplementary	0	0	0
Sterne	1998	Does the efficacy of BCG decline with time since vaccination?	Vaccination	1	0	0	1	0	0	0	1	0	0	1	0	1	1	0	1	Very low	Supplementary	10	0	10
Tamuzi	2015	Co-administration of oral polio vaccine and Bacillus Calmette Guerin in infants: systematic review of low- and middle-income countries	Vaccination	1	0	0	1	1	1	0	1	1	0	1	1	0	1	0		Very low	Supplementary	3	3	6
Thomas	2000	Preparing patients to travel abroad safely. Part 2: Updating vaccinations	Vaccination	1	0	0	0.5	0	0	0	0	0	0	-	-	0	0	-	0	Very low	Supplementary	0	0	0

## Sheet: Indirect effect
						PICO	Protocol	Selection	Search	Screen2	Extract2	Exclude	Include	Bias risk	Funding	Meta	MetaB	RoB	Hetero	P bias	CoI
Author	Year	Title	Top level category	Intervention	Primary outcome	AMSTAR 1	AMSTAR 2	AMSTAR 3	AMSTAR 4	AMSTAR 5	AMSTAR 6	AMSTAR 7	AMSTAR 8	AMSTAR 9	AMSTAR 10	AMSTAR 11	AMSTAR 12	AMSTAR 13	AMSTAR 14	AMSTAR 15	AMSTAR 16	Confidence (high, moderate, low, very low)	Core or supplementary review	Total number of included TB studies
Karumbi	2015	Directly observed therapy for treating tuberculosis	Adherence	DOT	Active and latent TB treatment completion	1	1	0	1	1	1	1	1	1	1	1	1	1	1	1	1	High	Core	11
Lewin	2010	Lay health workers in primary and community health care for maternal and child health and the management of infectious diseases	Adherence	Lay Health Workers	Active and latent TB treatment completion	1	1	0	1	1	1	1	1	1	1	1	1	1	1	1	1	High	Core	8
Liu	2014	Reminder systems to improve patient adherence to tuberculosis clinic appointments for diagnosis and treatment	Adherence	Reminder systems	Active and latent TB treatment completion	1	1	0	1	1	1	1	1	1	1	1	1	1	1	1	1	High	Core	9
Lutge	2015	Incentives and enablers to improve adherence in tuberculosis	Adherence	Incentive	Active and latent TB treatment completion	1	1	0	1	1	1	1	1	1	1	1	1	1	1	1	1	High	Core	12
Mbuagbaw	2015	Mobile phone text messaging interventions for HIV and other chronic diseases: an overview of systematic reviews and framework for evidence transfer	Adherence	mHealth	Various	1	0	1	1	1	1	0	1	1	0	-	-	-	-	-	1	High	Core	9
Nglazi	2013	Mobile phone text messaging for promoting adherence to anti-tuberculosis treatment: a systematic review	Adherence	mHealth	Active TB treatment completion	1	0	0	1	1	1	1	1	1	1	-	-	1	-	-	1	High	Core	4
Tian	2014	Effectiveness of directly observed treatment of tuberculosis: a systematic review of controlled studies.	Adherence	DOT	Active TB treatment completion	1	0.5	0	1	1	1	1	0.5	1	0	1	1	1	1	1	1	High	Core	23
Weaver	2015	Interventions to improve adherence to treatment for paediatric tuberculosis in low- and middle-income countries: a systematic review and meta-analysis	Adherence	Various	Active TB treatment completion	1	1	0	1	1	1	0.5	1	1	1	1	1	1	1	1	1	High	Core	15
Hwang	2005	Interventions to improve the health of the homeless: a systematic review	Adherence	Incentive (money)	Latent TB treatment completion	1	0	0	1	1	1	0	1	1	0	-	-	0	-	-	0	Low	Supplementary	3
Pasipanodya	2013	A meta-analysis of self-administered vs directly observed therapy effect on microbiologic failure, relapse, and acquired drug resistance in tuberculosis patients	Adherence	DOT	Microbiologic failure	1	0	0	1	1	1	0	1	0.5	0	1	1	0	1	1	1	Low	Supplementary	10
Stuurman	2016	Interventions for improving adherence to treatment for latent tuberculosis infection: a systematic review	Adherence	Various	Latent TB treatment completion	1	0.5	0	0.5	1	1	0.5	1	1	0	1	1	1	1	0	1	Low	Supplementary	23
Chaulk	1998	Directly observed therapy for treatment completion of pulmonary tuberculosis: Consensus Statement of the Public Health Tuberculosis Guidelines Panel	Adherence	DOT	Active TB treatment completion	1	1	0	0	0	0	0	0.5	0	0	-	-	0	-	-	0	Very low	Supplementary	27
de Pee	2013	The enabling effect of food assistance in improving adherence and/or treatment completion for antiretroviral therapy and tuberculosis treatment: a literature review	Adherence	Incentive (food)	Active TB treatment completion	1	0	0	0	0	0	0	0.5	0	0	-	-	0	-	-	0	Very low	Supplementary	10
Devi	2015	mHealth: An updated systematic review with a focus on HIV/AIDS and tuberculosis long term management using mobile phones	Adherence	mHealth	Various	1	0	0	1	0	0	0	0	0	0	-	-	0	-	-	1	Very low	Supplementary	6
Herrmann	2017	Contingency Management Interventions for HIV, Tuberculosis, and Hepatitis Control Among Individuals With Substance Use Disorders: A Systematized Review.	Adherence	Incentive (money)	Various	1	0	0	1	1	1	0	1	0	0	-	-	0	-	-	0	Very low	Supplementary	14
Hirsch-Moverman	2008	Adherence to treatment for latent tuberculosis infection: systematic review of studies in the US and Canada [Review article]	Adherence	Various	Latent TB treatment completion	1	0	0	0.5	1	1	0	1	0	0	-	-	0	-	-	0	Very low	Supplementary	19
Krishna	2002	Patient acceptance of educational voice messages: a review of controlled clinical studies	Adherence	Reminder systems	Appointments attended	1	0	0	1	0	0	0	1	0	0	-	-	0	-	-	0	Very low	Supplementary	2
Peterson	2003	Meta-analysis of trials of interventions to improve medication adherence	Adherence	Various	Medication adherence	1	0	0	0.5	0	1	0	0	0	0	1	0	0	0	1	1	Very low	Supplementary	-
Petry	2012	Financial reinforcers for improving medication adherence: findings from a meta-analysis	Adherence	Incentive (money)	Medication adherence	1	0	0	0.5	0	1	0	1	0	0	1	0	0	1	1	1	Very low	Supplementary	8
Sallum	2011	The impact of directly observed therapy (DOT) in patients with tuberculosis	Adherence	DOT	Medication adherence	1	0	0	0	0	0	0	0	0	0	-	-	0	-	-	0	Very low	Supplementary	37
Sarabi	2016	The effectiveness of mobile phone text messaging in improving medication adherence for patients with chronic diseases: A systematic review	Adherence	mHealth	Medication adherence	1	0	0	0.5	1	1	0	0	0	0	-	-	0	-	-	1	Very low	Supplementary	2
Schroeder	2013	Evaluating the risk of study withdrawal among treatment regimens for latent tuberculosis: A network meta-analysis	Adherence	Drug regimens	Latent TB treatment completion	1	0	0	0.5	0	0	0	0	0	0	1	0	0	0	0	0	Very low	Supplementary	23
Suwannakeeree	2015	Strategies to promote adherence to treatment by pulmonary tuberculosis patients: A systematic review	Adherence	Various	Active TB treatment completion	1	0	0	1	1	1	0	0	0.5	0	1	0	0	0	0	1	Very low	Supplementary	18
Hatherell	2016	Interpreting whole genome sequencing for investigating tuberculosis transmission: a systematic review	Contacts and transmission	Contact investigation	Various	1	1	0	1	1	1	0	1	0.5	1	-	-	0	-	-	1	Low	Supplementary	25
Shah	2014	Yield of contact investigations in households of patients with drug-resistant tuberculosis: systematic review and meta-analysis	Contacts and transmission	Contact investigation	Case yield	1	0	0	1	1	1	0.5	1	0.5	1	1	0	1	1	0	1	Low	Supplementary	25
Nikolayevskyy	2016	Whole genome sequencing of Mycobacterium tuberculosis for detection of recent transmission and tracing outbreaks: A systematic review	Contacts and transmission	Contact investigation	Case yield	1	1	0	1	1	1	0.5	1	0.5	1	-	-	1	-	-	1	Moderate	Supplementary	12
Fair	2012	Systematic review of tuberculosis contact investigation in low and middle income countries	Contacts and transmission	Contact investigation	Case yield	1	0	0	1	1	0	0	0	0	0	-	-	0	-	-	0	Very low	Supplementary	19
Fox	2013	Contact investigation for tuberculosis: a systematic review and meta-analysis	Contacts and transmission	Contact investigation	Case yield	1	0	1	1	1	1	0	0	0	1	1	1	0	1	1	1	Very low	Supplementary	203
Zenner	2013	Active TB case finding strategies in high-risk groups in low-incidence countries	Contacts and transmission	Contact investigation	Case yield	1	0	0	0	0	0	0	1	0	0	-	-	0	-	-	1	Very low	Supplementary	35
Auguste	2016	Accurate diagnosis of latent tuberculosis in children, people who are immunocompromised or at risk from immunosuppression and recent arrivals from countries with a high incidence of tuberculosis	Diagnosis	IGRA vs. TST	Diagnostic accuracy	1	1	0	1	1	1	1	1	1	1	1	1	1	1	1	1	High	Core	53
Ayubi	2015	Do the tuberculin skin test and the QuantiFERON-TB Gold in-tube test agree in detecting latent tuberculosis among high-risk contacts? A systematic review and meta-analysis	Diagnosis	IGRA vs. TST	Agreement (kappa)	1	0	0	0.5	1	1	0	1	1	1	1	1	1	1	1	1	High	Core	24
Dinnes	2007	A systematic review of rapid diagnostic tests for the detection of tuberculosis infection	Diagnosis	Rapid diagnostic tests	Diagnostic accuracy	1	0	1	1	1	1	1	1	1	1	1	1	1	1	-	1	High	Core	225
Drobniewski	2015	Systematic review, meta-analysis and economic modelling of molecular diagnostic tests for antibiotic resistance in tuberculosis	Diagnosis	DST	Diagnostic accuracy	1	0	1	1	1	1	1	1	1	1	1	1	1	1	-	1	High	Core	56
Nathavitharana	2017	Accuracy of line probe assays for the diagnosis of pulmonary and multidrug-resistant tuberculosis: a systematic review and meta-analysis	Diagnosis	DST	Diagnostic accuracy	1	0	1	1	1	1	0.5	1	1	1	1	1	1	1	-	1	High	Core	74
Pinto	2012	Scoring systems using chest radiographic features for the diagnosis of pulmonary tuberculosis in adults: A systematic review	Diagnosis	Clinical scoring	Diagnostic accuracy	1	0	0	1	1	1	0.5	1	1	1	1	1	1	0	-	1	High	Core	13
Steingart	2014	Xpert(R) MTB/RIF assay for pulmonary tuberculosis and rifampicin resistance in adults	Diagnosis	DST	Diagnostic accuracy	1	0	1	1	1	1	1	1	1	1	1	1	1	1	-	1	High	Core	27
Chang	2010	Systematic review of interferon-gamma release assays in tuberculosis: focus on likelihood ratios	Diagnosis	IGRA vs. TST	Likelihood ratio	1	0	0	0.5	0	0	0	0	0.5	0	1	0	0	1	1	0	Low	Supplementary	35
Diel	2012	Predictive value of interferon-gamma release assays and tuberculin skin testing for progression from latent TB infection to disease state: a meta-analysis	Diagnosis	IGRA vs. TST	Diagnostic accuracy	1	0	0	1	1	1	0	1	0.5	1	1	0	0	0	-	0	Low	Supplementary	28
Horne	2013	Diagnostic accuracy and reproducibility of WHO-endorsed phenotypic drug susceptibility testing methods for first-line and second-line antituberculosis drugs	Diagnosis	DST	Diagnostic accuracy	1	0	0	1	1	1	0.5	1	0.5	1	1	0	0	0	-	0	Low	Supplementary	108
Martin	2007	Colorimetric redox-indicator methods for the rapid detection of multidrug resistance in Mycobacterium tuberculosis: a systematic review and meta-analysis	Diagnosis	DST	Diagnostic accuracy	1	0	0	1	1	1	0	1	0.5	0	1	0	0	0	-	1	Low	Supplementary	18
Martin	2008	The nitrate reductase assay for the rapid detection of isoniazid and rifampicin resistance in Mycobacterium tuberculosis: a systematic review and meta-analysis	Diagnosis	DST	Diagnostic accuracy	1	0	0	1	1	1	0	1	0.5	0	1	0	0	0	-	1	Low	Supplementary	15
Mase	2007	Yield of serial sputum specimen examinations in the diagnosis of pulmonary tuberculosis: a systematic review	Diagnosis	Number of sputum specimens	Diagnostic accuracy	1	0	0	1	1	1	0	0	0	0	1	0	0	0	-	1	Very low	Supplementary	37
Minion	2010	Microscopic-observation drug susceptibility and thin layer agar assays for the detection of drug resistant tuberculosis: a systematic review and meta-analysis	Diagnosis	DST	Diagnostic accuracy	1	0	0	1	1	1	0.5	0	0	0	1	0	0	1	-	1	Very low	Supplementary	12
Morgan	2005	A commercial line probe assay for the rapid detection of rifampicin resistance in Mycobacterium tuberculosis: a systematic review and meta-analysis	Diagnosis	DST	Diagnostic accuracy	1	0	0	1	1	1	0.5	0	0	0	1	0	0	1	-	1	Very low	Supplementary	14
Cobelens	2012	Research on implementation of interventions in tuberculosis control in low- and middle-income countries: a systematic review	Healthcare systems	Various (scaling up in LMICs)	Qualitative	1	0	0	1	1	1	0.5	1	0	1	-	-	0	-	-	1	Very low	Supplementary	208
Lei	2015	Public-private mix for tuberculosis care and control: a systematic review	Healthcare systems	Public-private mix	Qualitative	1	0	0	1	1	1	0.5	1	0	1	-	-	0	-	-	1	Very low	Supplementary	78
NICE	2016	Tuberculosis (NICE guideline NG33)	Healthcare systems	Various	Qualitative	1	1	1	1	1	1	0	1	0.5	1	-	-	0	-	-	1	Low	Supplementary	-
Seidman	2017	Does task shifting yield cost savings and improve efficiency for health systems? A systematic review of evidence from low-income and middle-income countries	Healthcare systems	Task-shifting (LMICs)	Qualitative	1	0	0	1	0	0	0	1	0	1	-	-	0	-	-	1	Very low	Supplementary	34
Wu	2017	Evaluating the impact of healthcare provider training to improve tuberculosis management: a systematic review of methods and outcome indicators used	Healthcare systems	Evaluation of HCW training	Qualitative	1	0	0	1	1	0	0.5	1	0	1	-	-	0	-	-	1	Very low	Supplementary	21
WHO	2011	Use of tuberculosis interferon-gamma release assays (IGRAs) in low- and middle-income countries: policy statement	Healthcare-associated infection	IGRA vs. TST	Diagnostic accuracy	1	0	1	1	1	1	1	1	1	1	1	1	1	1	-	1	High	Core	-
Wisnivesky	2005	Validity of clinical prediction rules for isolating inpatients with suspected tuberculosis. A systematic review	Healthcare-associated infection	Clinical scoring	Diagnostic accuracy	1	0	0	0	1	1	0	1	1	0	-	-	1	-	1	1	Low	Supplementary	9
Lamberti	2015	Tuberculin skin test and Quantiferon test agreement and influencing factors in tuberculosis screening of healthcare workers: a systematic review and meta-analysis	Healthcare-associated infection	IGRA vs. TST	Diagnostic accuracy	1	0	0	1	1	1	0	1	0	0	1	0	0	1	-	1	Very low	Supplementary	29
Nienhaus	2013	IFN-gamma release assay versus tuberculin skin test for monitoring TB infection in healthcare workers	Healthcare-associated infection	IGRA vs. TST	Qualitative	1	0	0	0.5	0	0	0	0	0	0	-	-	0	0	-	1	Very low	Supplementary	26
Solari	2011	Evaluation of clinical prediction rules for respiratory isolation of inpatients with suspected pulmonary tuberculosis	Healthcare-associated infection	Clinical scoring	Diagnostic accuracy	1	0	0	0.5	0	0	0	1	0	0	1	0	0	0	-	1	Very low	Supplementary	13
Zwerling	2012	Interferon-gamma release assays for tuberculosis screening of healthcare workers: a systematic review	Healthcare-associated infection	IGRA vs. TST	Diagnostic accuracy	1	0	0	1	0	0	0	1	0	1	-	-	0	0	-	1	Very low	Supplementary	45
Ayubi	2016	The Clinical Usefulness of Tuberculin Skin Test versus Interferon-Gamma Release Assays for Diagnosis of Latent Tuberculosis in HIV Patients: A Meta-Analysis	HIV/TB	IGRA vs. TST	Agreement (kappa)	1	0	0	1	1	1	0.5	1	1	1	1	1	1	1	1	1	High	Core	24
Kerkhoff	2012	Systematic review of TST responses in people living with HIV in under-resourced settings: implications for isoniazid preventive therapy	HIV/TB	TST pre-IPT	TST-positivity	1	0	0	1	1	1	0	1	1	1	1	0	1	0	0	1	Low	Supplementary	19
Wikman-Jorgensen	2014	Microscopic observation drug susceptibility assay for the diagnosis of TB and MDR-TB in HIV-infected patients: a systematic review and meta-analysis	HIV/TB	DST	Diagnostic accuracy		0	0	1	1	1	0.5	1	1	0	1	1	1	1	0	0	Low	Supplementary	10
Arentz	2012	Use of Anti-Retroviral Therapy in Tuberculosis Patients on Second-Line Anti-TB Regimens: A Systematic Review	HIV/TB	ART in drug-resistant TB	Cure rate	1	0	0	1	1	1	0.5	1	1	1	1	0	0	0	0	1	Very low	Supplementary	10
Cattamanchi	2011	Interferon-gamma release assays for the diagnosis of latent tuberculosis infection in HIV-infected individuals: a systematic review and meta-analysis	HIV/TB	IGRA vs. TST	Diagnostic accuracy	1	0	0	1	1	1	0	1	0	1	1	0	0	0	0	1	Very low	Supplementary	37
Legido-Quigley	2013	Integrating tuberculosis and HIV services in low- and middle-income countries: a systematic review	HIV/TB	Integrated services	Qualitative	1	0	0	1	1	1	0	0	0	1	-	-	0	-	-	0	Very low	Supplementary	133
Ahuja	2012	Multidrug resistant pulmonary tuberculosis treatment regimens and patient outcomes: an individual patient data meta-analysis of 9,153 patients	MDR-TB	Regimens	Treatment success	1	0	0	-	-	-	1	1	0	1	1	0	1	1	-	1	Low	Supplementary	3 systematic reviews (32 studies)
Chang	2013	WHO group 5 drugs and difficult multidrug-resistant tuberculosis: a systematic review with cohort analysis and meta-analysis	MDR-TB	Regimens (WHO Grp 5)	Treatment success	1	0	0	1	0	0	0.5	0	0	1	1	0	1	1	1	1	Low	Supplementary	20
Fox	2017	Group 5 drugs for multidrug-resistant tuberculosis: individual patient data meta-analysis	MDR-TB	Regimens (WHO Grp 5)	Treatment success	1	0	0	-	-	-	1	1	1	1	1	0	1	1	0	1	Low	Supplementary	3 systematic reviews (31 studies)
Bassili	2013	A systematic review of the effectiveness of hospital- and ambulatory-based management of multidrug-resistant tuberculosis	MDR-TB	Ambulatory management	Treatment success	1	0	0	1	0	0	0	1	0	1	1	0	0	1	1	0	Very low	Supplementary	35
Bastos	2014	Treatment outcomes of patients with multidrug-resistant and extensively drug-resistant tuberculosis according to drug susceptibility testing to first- and second-line drugs: an individual patient data meta-analysis	MDR-TB	DST	Treatment success	1	0	0	-	-	-	1	1	0	1	1	0	0	1	-	1	Very low	Supplementary	3 systematic reviews (32 studies)
Bastos	2017	An updated systematic review and meta-analysis for treatment of multidrug-resistant tuberculosis	MDR-TB	Regimens	Treatment success	1	0	0	1	1	1	0	1	0	1	1	0	0	0	0	1	Very low	Supplementary	74
Ettehad	2012	Treatment outcomes for children with multidrug-resistant tuberculosis: a systematic review and meta-analysis	MDR-TB	Regimens (paediatric)	Treatment success	1	0	0	1	1	0	0.5	1	0	1	1	0	0	0	0	1	Very low	Supplementary	8
Falzon	2013	Resistance to fluoroquinolones and second-line injectable drugs: Impact on multidrug-resistant TB outcomes	MDR-TB	Regimens	Treatment success	1	0	0	1	0	0	0	1	0	1	1	0	0	0	0	1	Very low	Supplementary	32
Fox	2016	Propensity Score-Based Approaches to Confounding by Indication in Individual Patient Data Meta-Analysis: Non-Standardized Treatment for Multidrug Resistant Tuberculosis	MDR-TB	Regimens (WHO Grp 5)	Treatment success	1	0	0	-	-	-	0	1	0	1	1	0	0	1	0	1	Very low	Supplementary	3 systematic reviews (31 studies)
Ghimire	2016	Pharmacokinetic/pharmacodynamic-based optimization of levofloxacin administration in the treatment of MDR-TB	MDR-TB	Therapeutic drug monitoring	Treatment success	1	0	0	0	0	0	0.5	1	0	1	1	0	0	0	0	1	Very low	Supplementary	37
Ho	2017	Decentralized care for multidrug-resistant tuberculosis: a systematic review and meta-analysis	MDR-TB	Decentralized care	Treatment success	1	0	0	1	1	1	0.5	1	0	1	1	0	0	0	-	1	Very low	Supplementary	8
Kibret	2017	Treatment outcomes for multidrug-resistant tuberculosis under DOTS-Plus: a systematic review and meta-analysis of published studies	MDR-TB	DOTS+	Treatment success	1	0	0	1	1	1	0.5	1	0	1	1	0	0	0	0	1	Very low	Supplementary	14
Orenstein	2009	Treatment outcomes among patients with multidrug-resistant tuberculosis: systematic review and meta-analysis	MDR-TB	Regimens	Treatment success	1	0	0	1	1	0	0.5	1	0	1	1	0	0	1	0	1	Very low	Supplementary	33
Thomas	2016	Psycho-Socio-Economic Issues Challenging Multidrug Resistant Tuberculosis Patients: A Systematic Review	MDR-TB	Psychosocial	Qualitative	1	0	0	1	1	0	0.5	0	0	1	-	-	0	-	-	0	Very low	Supplementary	15
Toczek	2013	Strategies for reducing treatment default in drug-resistant tuberculosis: systematic review and meta-analysis	MDR-TB	Various	Treatment default	1	0	0	1	1	1	0.5	1	0	0	1	0	0	0	0	0	Very low	Supplementary	75
Weiss	2014	Treatment outcomes from community-based drug resistant tuberculosis treatment programs: a systematic review and meta-analysis	MDR-TB	Community-based care	Treatment success	1	0	0	1	1	1	0.5	1	0	0	1	0	0	0	1	1	Very low	Supplementary	10
Yin	2016	Association between Directly Observed Therapy and Treatment Outcomes in Multidrug-Resistant Tuberculosis: A Systematic Review and Meta-Analysis	MDR-TB	DOT	Treatment success	1	0	0	1	1	1	0.5	1	0	1	1	0	0	0	1	0	Very low	Supplementary	31
Vinkeles	2013	State of affairs of tuberculosis in prison facilities: a systematic review of screening practices and recommendations for best TB control	Prisons	Screening	Various	1	0	0	1	1	1	0	1	0	1	-	-	0	-	0	1	Very low	Supplementary	52
van't Hoog	2013	A systematic review of the sensitivity and specificity of symptom- and chest-radiography screening for active pulmonary tuberculosis in HIV-negative persons and persons with unknown HIV status	Screening	Active TB screening in HIV-negative	Various	1	1	0	1	1	1	0.5	1	1	0	1	0	1	1	1	0	High	Core	17
Aldridge	2014	Pre-entry screening programmes for tuberculosis in migrants to low-incidence countries: a systematic review and meta-analysis	Screening	Pre-entry	Case yield	1	0	0	1	1	1	0	1	1	1	1	0	1	1	0	1	Low	Supplementary	15
Campbell	2015	A systematic review on TST and IGRA tests used for diagnosis of LTBI in immigrants	Screening	Post-entry	Qualitative	1	0	0	1	0	1	0.5	1	1	1	-	-	0	-	-	1	Low	Supplementary	51
Chan	2017	Post-migration follow-up of migrants identified to be at increased risk of developing tuberculosis at pre-migration screening: a systematic review and meta-analysis	Screening	Pre-entry	Post-entry incidence	1	0	0	1	1	1	0.5	1	1	1	1	0	0	1	-	1	Low	Supplementary	20
Kranzer	2013	The benefits to communities and individuals of screening for active tuberculosis disease: a systematic review	Screening	Active TB screening	Various	1	1	0	1	1	1	0	1	1	0	1	0	1	1	0	1	Low	Supplementary	62
Arshad	2010	Active screening at entry for tuberculosis among new immigrants: a systematic review and meta-analysis	Screening	Post-entry	Case yield	1	0	0	1	1	1	0.5	1	0	1	1	0	0	1	0	1	Very low	Supplementary	22
Bozorgmehr	2017	Yield of active screening for tuberculosis among asylum seekers in Germany: a systematic review and meta-analysis	Screening	Post-entry	Case yield	1	1	0	1	1	0	0.5	1	0	0	1	0	0	1	0	1	Very low	Supplementary	6
Campbell	2015	Latent tuberculosis infection screening in immigrants to low-incidence countries: a meta-analysis	Screening	Post-entry	IGRA vs. TST	1	0	0	1	0	1	0.5	1	0	1	1	0	0	1	0	1	Very low	Supplementary	45
Greveson	2009	Can ELISpot replace the tuberculin skin test for latent tuberculosis?	Screening	LTBI screening	IGRA vs. TST	1	0	0	1	0	0	0	1	0	0	-	-	0	-	-	0	Very low	Supplementary	2
Jeon	2010	Bi-directional screening for tuberculosis and diabetes: a systematic review	Screening	Bi-directional screening (diabetes - TB)	Case yield	1	0	0	1	0	1	0.5	1	0	0	-	-	0	-	-	0	Very low	Supplementary	30
Malekinejad	2017	Yield of community-based tuberculosis targeted testing and treatment in foreign-born populations in the United States: A systematic review	Screening	Targeted testing and treatment (TTT)	Case yield and treatment completion	1	1	0	1	1	1	0.5	1	0	1	1	0	0	1	0	1	Very low	Supplementary	15
Sammeh	2014	Effectiveness and cost effectiveness of screening immigrants schemes for tuberculosis (TB) on arrival from high TB endemic countries to low TB prevalent countries	Screening	Point-of-entry	Various	1	0	0	0	1	1	0	1	0	0	-	-	0	-	-	0	Very low	Supplementary	4
Shapiro	2013	A systematic review of the number needed to screen to detect a case of active tuberculosis in different risk groups	Screening	Active TB screening	Number needed to screen (NNS)	1	0	0	1	1	1	0	1	0	0	1	0	0	-	-	0	Very low	Supplementary	606
Tan	2001	Screening non-immigrant visitors to the United States for tuberculosis: report of the Council on Scientific Affairs	Screening	Non-immigrant visitors	Qualitative	0	0	0	0	0	0	0	0	0	1	-	-	0	-	-	1	Very low	Supplementary	n/r
Zenner	2017	Effectiveness and cost effectiveness of screening migrants for active tuberculosis and latent tuberculous infection	Screening	Pre-, point-of- and post-entry	Qualitative	1	0	0	0	0	0	0	1	1	1	-	-	0	-	-	1	Very low	Supplementary	55
van Hoorn	2016	The Effects of Psycho-Emotional and Socio-Economic Support for Tuberculosis Patients on Treatment Adherence and Treatment Outcomes - A Systematic Review and Meta-Analysis	Social support and vulnerable groups	Psychosocial (PS) and socioeconomic (SE)	Treatment success	1	0	0	1	1	1	0.5	1	1	1	1	0	1	1	1	1	High	Core	21
Grenfell	2013	Tuberculosis, injecting drug use and integrated HIV-TB care: a review of the literature	Social support and vulnerable groups	Integrated services for PWID	Qualitative	1	0	0	1	0	0	0	1	0	1	-	-	0	-	-	1	Very low	Supplementary	89
Gallardo	2016	Fixed-dose combinations of drugs versus single-drug formulations for treating pulmonary tuberculosis	Treatment	Fixed dose combination therapy	Treatment success	1	1	0	1	1	1	0.5	1	1	0	1	0	1	1	1	0	High	Core	13
Gegia	2017	Treatment of isoniazid-resistant tuberculosis with first-line drugs: a systematic review and meta-analysis	Treatment	Regimens (IH-resistant TB)	Treatment success	1	0	0	1	1	0	0.5	1	1	1	1	0	1	1	-	1	High	Core	52
Grobler	2016	Nutritional supplements for people being treated for active tuberculosis	Treatment	Nutritional supplementation	Treatment success	1	1	1	1	1	1	0.5	1	1	0	1	0	1	1	1	0	High	Core	35
Jeyashree	2016	Smoking cessation interventions for pulmonary tuberculosis treatment outcomes	Treatment	Smoking cessation	Treatment success	1	1	1	1	1	1	0.5	-	1	0	-	-	-	-	-	0	High	Core	0
Johnston	2017	Effect of Intermittency on Treatment Outcomes in Pulmonary Tuberculosis: An Updated Systematic Review and Meta-analysis	Treatment	Regimens (intermittent)	Treatment success	1	1	1	1	1	0	0.5	1	1	1	1	0	1	1	1	1	High	Core	7
Kasozi	2015	Intermittent Versus Daily Pulmonary Tuberculosis Treatment Regimens: A Meta-Analysis	Treatment	Regimens (intermittent)	Treatment success	1	1	1	1	1	1	0.5	1	1	1	1	0	1	1	-	1	High	Core	27
Menzies	2009	Standardized treatment of active tuberculosis in patients with previous treatment and/or with mono-resistance to isoniazid: A systematic review and meta-analysis	Treatment	Regimens (IH-resistant TB)	Treatment success	1	1	1	1	1	0	0.5	1	1	1	1	0	1	1	-	1	High	Core	42
Mota	2016	Therapeutic drug monitoring in anti-tuberculosis treatment: a systematic review and meta-analysis.	Treatment	Therapeutic drug monitoring	Treatment success	1	1	1	1	0	1	0.5	1	1	1	1	1	1	1	1	1	High	Core	41
Mwandumba	2009	Fully intermittent dosing with drugs for treating tuberculosis in adults	Treatment	Regimens (intermittent)	Treatment success	1	1	1	1	1	1	0.5	1	1	0	-	-	-	-	-	0	High	Core	1
Albanna	2013	Fixed Dose Combination anti-tuberculosis therapy: A systematic review and meta-analysis	Treatment	Fixed dose combination therapy	Treatment success	1	0	0	1	1	0	0.5	1	1	0	1	0	0	1	1	1	Low	Supplementary	19
Chang	2011	Treatment of tuberculosis and optimal dosing schedules	Treatment	Daily dosing	Treatment success	1	0	0	1	0	1	0.5	1	1	0	-	-	0	-	-	0	Low	Supplementary	17 (inc. 9 systematic reviews)
Si	2015	Adjuvant Efficacy of Nutrition Support During Pulmonary Tuberculosis Treating Course: Systematic Review and Meta-analysis	Treatment	Nutritional supplementation	Various	1	0	0	1	1	1	0	1	1	1	1	0	0	1	1	1	Low	Supplementary	19
Sotgiu	2015	Monitoring toxicity in individuals receiving treatment for latent tuberculosis infection: a systematic review versus expert opinion	Treatment	Toxicity monitoring	Treatment success	1	0	0	1	0	0	0	-	0	0	-	-	-	-	-	1	Low	Supplementary	0
Bangalore	2007	Fixed-dose combinations improve medication compliance: a meta-analysis	Treatment	Fixed dose combination therapy	Treatment compliance	1	0	0	0	0	0	0	1	0	0	1	0	0	0	1	0	Very low	Supplementary	2
Chen	2011	Fluoroquinolones are associated with delayed treatment and resistance in tuberculosis: a systematic review and meta-analysis	Treatment	Fluoroquinolones	Treatment delay	1	0	0	1	0	1	0.5	1	0	0	1	0	0	1	1	1	Very low	Supplementary	9
Han	2006	Effectiveness of standard short-course chemotherapy for treating tuberculosis and the impact of drug resistance on its outcome	Treatment	Regimens (short-course)	Treatment success	1	0	0	1	1	1	1	1	0	0	-	-	0	-	-	0	Very low	Supplementary	11
Wilby	2014	Review of evidence for measuring drug concentrations of first-line antitubercular agents in adults	Treatment	Therapeutic drug monitoring	Treatment success	1	0	0	1	0	0	0.5	1	0	1	-	-	0	-	-	1	Very low	Supplementary	40
